# Supplementary material for: Tick-borne Agents in Rodents, China, 2004–2006
Source: PubMed Central journal article supplement (PMC3044509; doi:10.3201/eid1512.081141), 2009-12
Supplement: 08-1141_appT1-s1.pdf [file 08-1141_appT1-s1.pdf]

Appendix Table 1. Co-infection rates for 4 tick-borne agents in rodents, People's Republic of China, 2004–2006\*

| Study site            | No. rodents tested | No. (%) rodents positive                                         |                                               |                                                             |                                           |                                                |                                          |              |                                                                              |                                                                         |                                                                       |                                                                   |         | Triple infection | Total no. (%) |
|-----------------------|--------------------|------------------------------------------------------------------|-----------------------------------------------|-------------------------------------------------------------|-------------------------------------------|------------------------------------------------|------------------------------------------|--------------|------------------------------------------------------------------------------|-------------------------------------------------------------------------|-----------------------------------------------------------------------|-------------------------------------------------------------------|---------|------------------|---------------|
|                       |                    | <i>Anaplasma phagocytophilum</i> and <i>Borrelia burgdorferi</i> | <i>A. phagocytophilum</i> and SFG rickettsiae | <i>A. phagocytophilum</i> and <i>Francisella tularensis</i> | <i>B. burgdorferi</i> and SFG rickettsiae | <i>B. burgdorferi</i> and <i>F. tularensis</i> | SFG rickettsiae and <i>F. tularensis</i> | Co-infection | <i>A. phagocytophilum</i> , <i>B. burgdorferi</i> , and <i>F. tularensis</i> | <i>A. phagocytophilum</i> , <i>B. burgdorferi</i> , and SFG rickettsiae | <i>A. phagocytophilum</i> , SFG rickettsiae, and <i>F. tularensis</i> | <i>B. burgdorferi</i> , SFG rickettsiae, and <i>F. tularensis</i> |         |                  |               |
| Heilongjiang Province | 64                 | 0                                                                | 0                                             | 0                                                           | 0                                         | 0                                              | 0                                        | 0            | 0                                                                            | 1 (1.6)                                                                 | 0                                                                     | 0                                                                 | 1 (1.6) | 1 (1.6)          |               |
| Jilin Province        | 205                | 0                                                                | 0                                             | 2 (1.0)                                                     | 0                                         | 5 (2.4)                                        | 0                                        | 7 (3.4)      | 2 (1.0)                                                                      | 0                                                                       | 0                                                                     | 0                                                                 | 2 (1.0) | 9 (4.4)          |               |
| IMAR                  | 148                | 0                                                                | 0                                             | 0                                                           | 2 (1.4)                                   | 0                                              | 0                                        | 2 (1.4)      | 0                                                                            | 0                                                                       | 0                                                                     | 0                                                                 | 0       | 2 (1.4)          |               |
| XJAR                  | 44                 | 0                                                                | 0                                             | 0                                                           | 0                                         | 0                                              | 0                                        | 0            | 0                                                                            | 0                                                                       | 0                                                                     | 0                                                                 | 0       | 0                |               |
| Zhejiang Province     | 216                | 1 (0.5)                                                          | 1 (0.5)                                       | 0                                                           | 3 (1.4)                                   | 0                                              | 0                                        | 5 (2.3)      | 0                                                                            | 0                                                                       | 0                                                                     | 0                                                                 | 0       | 5 (2.3)          |               |
| Guizhou Province      | 28                 | 0                                                                | 0                                             | 0                                                           | 1 (3.6)                                   | 0                                              | 0                                        | 1 (3.6)      | 0                                                                            | 0                                                                       | 0                                                                     | 0                                                                 | 0       | 1 (3.6)          |               |
| Total                 | 705                | 1 (0.1)                                                          | 1 (0.1)                                       | 2 (0.3)                                                     | 6 (0.9)                                   | 5 (0.7)                                        | 0                                        | 15 (2.1)     | 2 (0.3)                                                                      | 1 (0.1)                                                                 | 0                                                                     | 0                                                                 | 3 (0.4) | 18 (2.6)         |               |

\*SFG, spotted fever group; IMAR, Inner Mongolia Autonomous Region; XJAR, Xinjiang Autonomous Region.
