# Supplementary material for: Tick-borne Agents in Rodents, China, 2004–2006
Source: PubMed Central journal article supplement (PMC3044509; doi:10.3201/eid1512.081141), 2009-12
Supplement: 08-1141_appT2-s2.pdf [file 08-1141_appT2-s2.pdf]

Appendix Table 2. PCR results for 4 tick-borne agents in rodents, People's Republic of China, 2004–2006\*

| Species                        | No. (%)<br>rodents<br>tested | Study site, no. (%) rodents positive |                    |                    |                   |                      |                     | No. (%) rodents positive             |                                 |                           |                                   | No. (%)<br>co-infected |
|--------------------------------|------------------------------|--------------------------------------|--------------------|--------------------|-------------------|----------------------|---------------------|--------------------------------------|---------------------------------|---------------------------|-----------------------------------|------------------------|
|                                |                              | Heilongjiang<br>Province             | Jilin Province     | IMAR               | XJAR              | Zhejiang<br>Province | Guizhou<br>Province | <i>Anaplasma<br/>phagocytophilum</i> | <i>Borrelia<br/>burgdorferi</i> | SFG<br><i>rickettsiae</i> | <i>Francisella<br/>tularensis</i> |                        |
| <i>Apodemus agrarius</i>       | 142 (20.1)                   | 13 (20.3)                            | 75 (36.2)          | 44 (29.6)          | 0                 | 10 (4.6)             | 0                   | 14 (9.9)                             | 4 (2.8)                         | 27 (19.0)                 | 14 (9.9)                          | 4 (2.8)                |
| <i>A. peninsulae</i>           | 74 (10.4)                    | 13 (20.3)                            | 56 (27.1)          | 5 (3.4)            | 0                 | 0                    | 0                   | 4 (5.4)                              | 9 (12.2)                        | 1 (1.4)                   | 7 (9.5)                           | 3 (4.1)                |
| <i>A. sylvaticus</i>           | 21 (3.0)                     | 0                                    | 0                  | 0                  | 0                 | 21 (9.7)             | 0                   | 2 (9.5)                              | 3 (14.3)                        | 7 (33.3)                  | 0                                 | 3 (14.3)               |
| <i>Cricetulus barabensis</i>   | 11 (1.6)                     | 0                                    | 0                  | 10 (6.8)           | 0                 | 1 (0.5)              | 0                   | 0                                    | 1 (9.1)                         | 0                         | 0                                 | 0                      |
| <i>C. migratorius</i>          | 2 (0.3)                      | 0                                    | 1 (0.5)            | 0                  | 0                 | 1 (0.5)              | 0                   | 0                                    | 0                               | 0                         | 0                                 | 0                      |
| <i>C. triton</i>               | 5 (0.7)                      | 0                                    | 5 (2.4)            | 0                  | 0                 | 0                    | 0                   | 0                                    | 1 (20.0)                        | 0                         | 1 (20.0)                          | 1 (20.0)               |
| <i>Cricetulus</i> sp.          | 39 (5.5)                     | 0                                    | 17 (8.3)           | 0                  | 5 (11.3)          | 17 (7.9)             | 0                   | 2 (5.1)                              | 0                               | 0                         | 2 (5.1)                           | 0                      |
| <i>Clethrionomys rufocanus</i> | 65 (9.2)                     | 37 (57.8)                            | 23 (11.1)          | 5 (3.4)            | 0                 | 0                    | 0                   | 3 (4.6)                              | 6 (9.2)                         | 1 (1.5)                   | 2 (3.1)                           | 1 (1.5)                |
| <i>Clethrionomys rutilus</i>   | 13 (1.8)                     | 0                                    | 0                  | 13 (8.8)           | 0                 | 0                    | 0                   | 0                                    | 0                               | 1 (7.7)                   | 0                                 | 0                      |
| <i>Meriones unguiculatus</i>   | 15 (2.1)                     | 0                                    | 0                  | 0                  | 15 (34.1)         | 0                    | 0                   | 0                                    | 0                               | 1 (6.7)                   | 1 (6.7)                           | 0                      |
| <i>Microtus maximowiczii</i>   | 35 (4.9)                     | 0                                    | 0                  | 35 (23.7)          | 0                 | 0                    | 0                   | 0                                    | 0                               | 0                         | 1 (2.9)                           | 0                      |
| <i>Mus pahari</i>              | 7 (1.0)                      | 0                                    | 0                  | 0                  | 0                 | 0                    | 7 (25.0)            | 0                                    | 0                               | 1 (14.28)                 | 0                                 | 0                      |
| <i>Mus musculus</i>            | 46 (6.5)                     | 0                                    | 4 (1.9)            | 12 (8.1)           | 22 (50.0)         | 0                    | 8 (28.6)            | 0                                    | 2 (4.7)                         | 8 (18.6)                  | 0                                 | 1 (1.3)                |
| <i>Niviventer confucianus</i>  | 115 (16.2)                   | 0                                    | 0                  | 0                  | 0                 | 115 (53.2)           | 0                   | 6 (5.2)                              | 10 (8.7)                        | 8 (7.0)                   | 0                                 | 2 (1.7)                |
| <i>N. coxingi</i>              | 4 (0.6)                      | 0                                    | 0                  | 0                  | 0                 | 4 (1.8)              | 0                   | 1 (25)                               | 1 (25)                          | 0                         | 0                                 | 0                      |
| <i>N. fulvescens</i>           | 2 (2.8)                      | 0                                    | 0                  | 0                  | 0                 | 2 (0.9)              | 0                   | 0                                    | 0                               | 0                         | 0                                 | 0                      |
| <i>Rattus losea</i>            | 32 (0.5)                     | 0                                    | 0                  | 0                  | 0                 | 30 (13.9)            | 2 (7.1)             | 1 (3.1)                              | 3 (9.4)                         | 6 (18.8)                  | 0                                 | 1 (3.1)                |
| <i>R. norvegicus</i>           | 47 (6.6)                     | 1 (1.6)                              | 13 (6.2)           | 12 (8.1)           | 0                 | 12 (5.6)             | 9 (32.2)            | 4 (8.5)                              | 3 (6.4)                         | 2 (4.3)                   | 2 (4.3)                           | 1(2.1)                 |
| <i>Tamias sibiricu</i>         | 18 (2.5)                     | 0                                    | 11 (5.3)           | 7 (4.7)            | 0                 | 0                    | 0                   | 1 (5.6)                              | 2 (11.2)                        | 0 (0)                     | 5 (27.8)                          | 1 (5.6)                |
| NI                             | 6 (0.9)                      | 0                                    | 0                  | 5 (3.4)            | 0                 | 1 (0.5)              | 0                   | 0                                    | 2 (33)                          | 1 (17)                    | 0                                 | 0                      |
| Others                         | 6 (0.9)                      | 0                                    | 0                  | 0                  | 2 (4.6)           | 2 (0.9)              | 2 (7.1)             | 1 (10.0)                             | 0                               | 0                         | 0                                 | 0                      |
| <b>Total</b>                   | <b>705 (100.0)</b>           | <b>64 (100.0)</b>                    | <b>205 (100.0)</b> | <b>148 (100.0)</b> | <b>44 (100.0)</b> | <b>216 (100.0)</b>   | <b>28 (100.0)</b>   | <b>39 (5.5)</b>                      | <b>47 (6.7)</b>                 | <b>64 (9.1)</b>           | <b>35 (5.0)</b>                   | <b>18 (2.6)</b>        |

\*SFG, spotted fever group; IMAR, Inner Mongolia Autonomous Region; XJAR, Xinjiang Autonomous Region; NI, not identified.
